# Supplementary material
Source: PubMed Central journal article supplement (PMC7679069)
Supplement: NIHMS1030007-supplement-SI.pdf [file NIHMS1030007-supplement-SI.pdf]

# Supporting Information:

## Table of Contents

### Influence of hydrophobic face amino acids on the hydrogelation of $\beta$ -hairpin peptide amphiphiles

| <u>Content</u>                                | <u>Figure No.</u> |
|-----------------------------------------------|-------------------|
| Dynamic frequency and strain sweep for M(Abu) | Fig. S1           |
| Dynamic frequency and strain sweep for MAX1   | Fig. S2           |
| Dynamic frequency and strain sweep for M(Nva) | Fig. S3           |
| Dynamic frequency and strain sweep for M(Nle) | Fig. S4           |
| Dynamic frequency and strain sweep for M(Phe) | Fig. S5           |
| Dynamic frequency and strain sweep for M(Ile) | Fig. S6           |
| SANS data for M(Nva)                          | Fig. S7           |
| SANS data for M(Nle)                          | Fig. S8           |
| SANS data for M(Phe)                          | Fig. S9           |
| SANS Data for M(Ile)                          | Fig. S10          |
| RP-HPLC and ESI-MS of M(Abu)                  | Fig. S11          |
| RP-HPLC and ESI-MS of MAX1                    | Fig. S12          |
| RP-HPLC and ESI-MS of M(Nva)                  | Fig. S13          |
| RP-HPLC and ESI-MS of M(Nle)                  | Fig. S14          |
| RP-HPLC and ESI-MS of M(Phe)                  | Fig. S15          |
| RP-HPLC and ESI-MS of M(Ile)                  | Fig. S16          |

### A. Dynamic Frequency Sweep

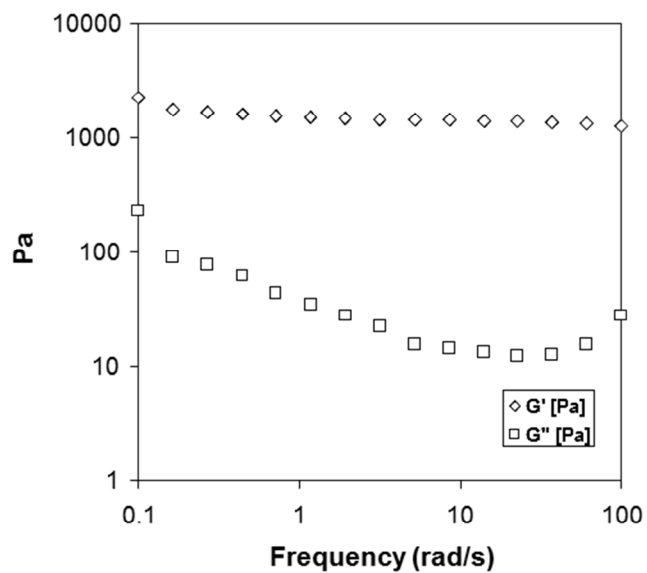

### B. Dynamic Strain Sweep

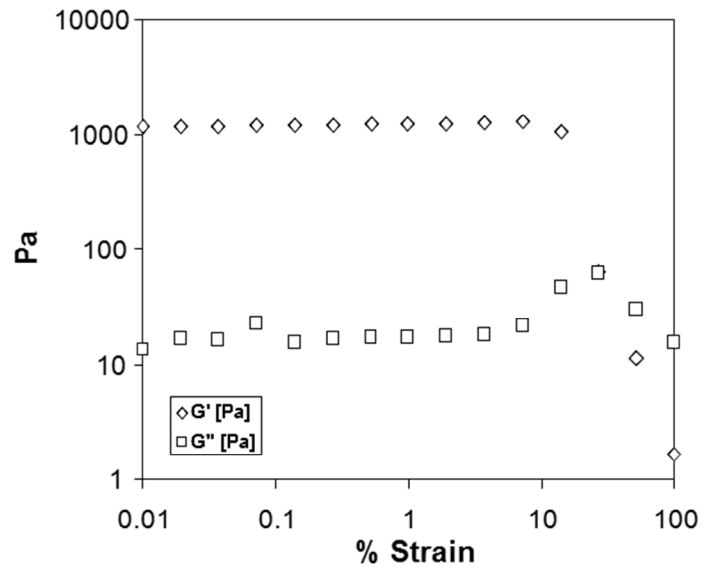

**Figure S1:** (A) Dynamic frequency and (B) strain sweep of 1wt% M(Abu) gels at 80°C in 125 mM borate, 10 mM NaCl, pH 9 buffer.

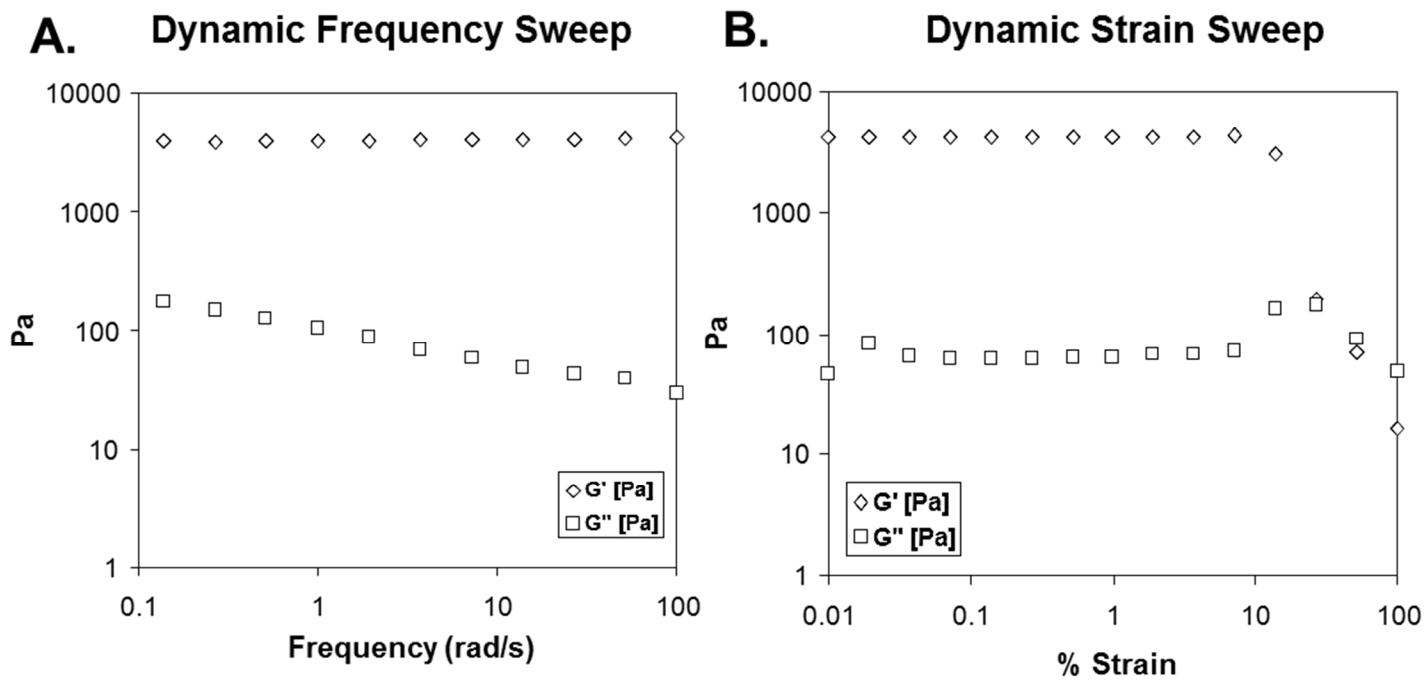

**Figure S2:** (A) Dynamic frequency and (B) strain sweep of 1wt% MAX1 gels at 50°C in 125 mM borate, 10 mM NaCl, pH 9 buffer.

**A. Dynamic Frequency Sweep**

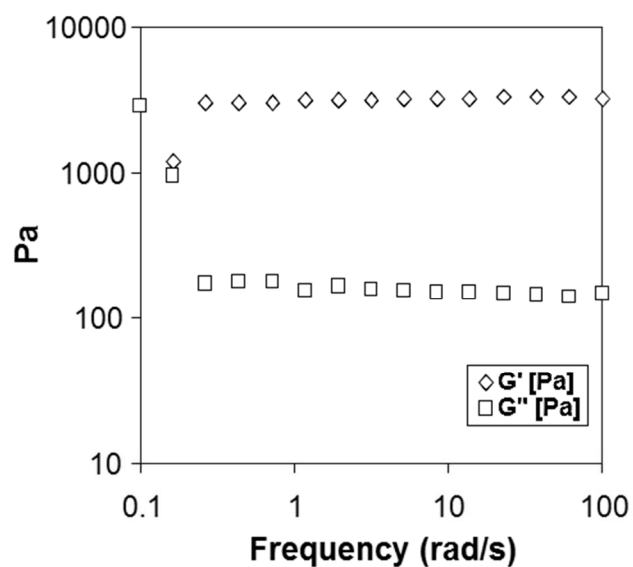

**B. Dynamic Strain Sweep**

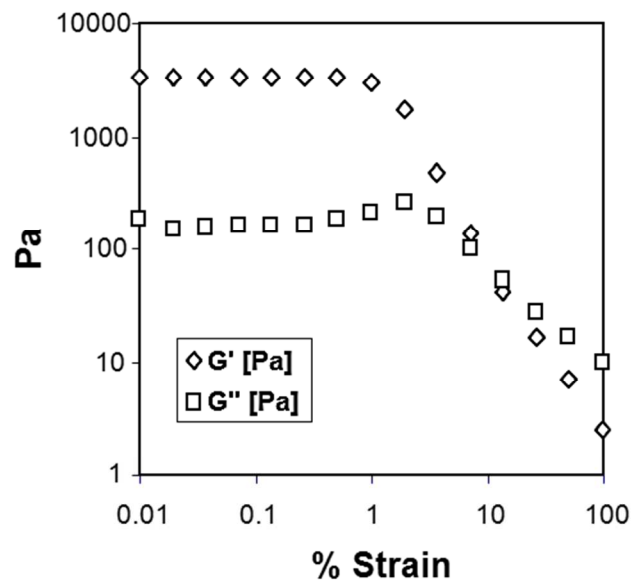

**Figure S3:** (A) Dynamic frequency and (B) strain sweep of 1wt% M(Nva) gels at 50°C in 125 mM borate, 10 mM NaCl, pH 9 buffer.

**A. Dynamic Frequency Sweep**

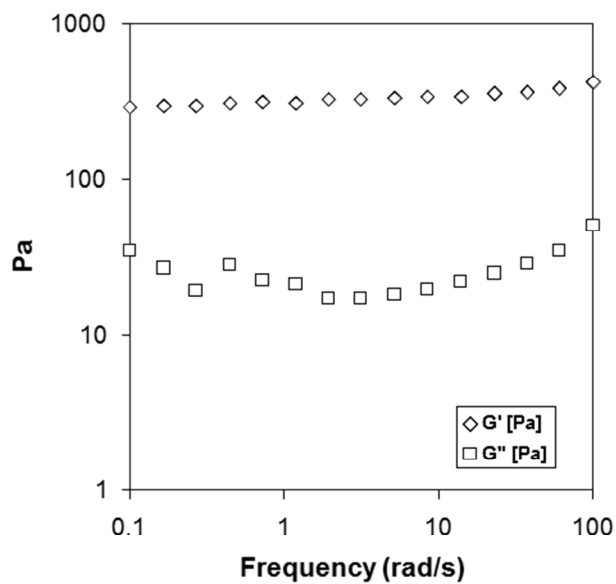

**B. Dynamic Strain Sweep**

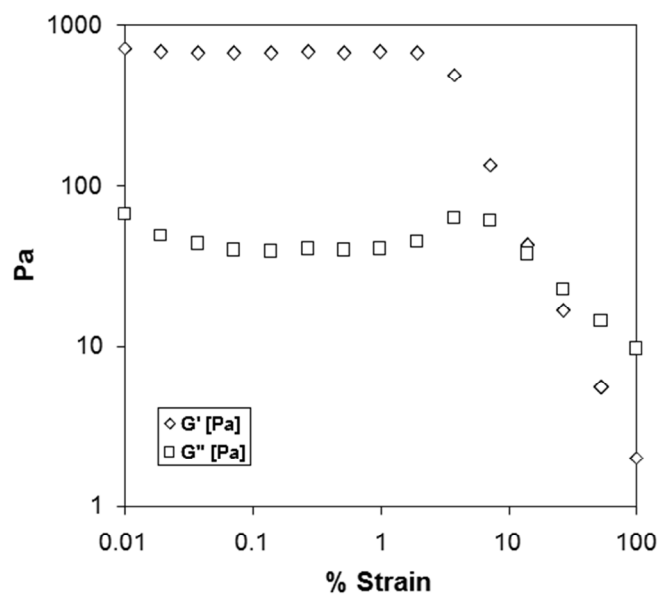

**Figure S4:** (A) Dynamic frequency and (B) strain sweep of 1wt% M(Nle) gels at 50°C in 125 mM borate, 10 mM NaCl, pH 9 buffer

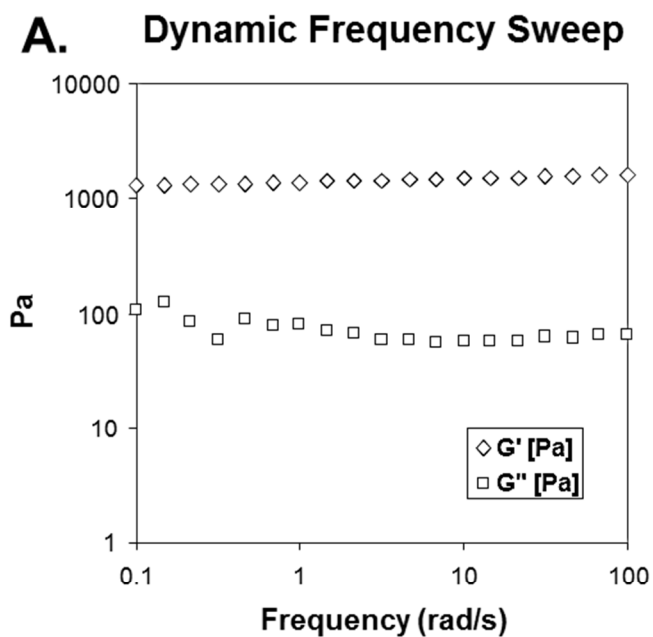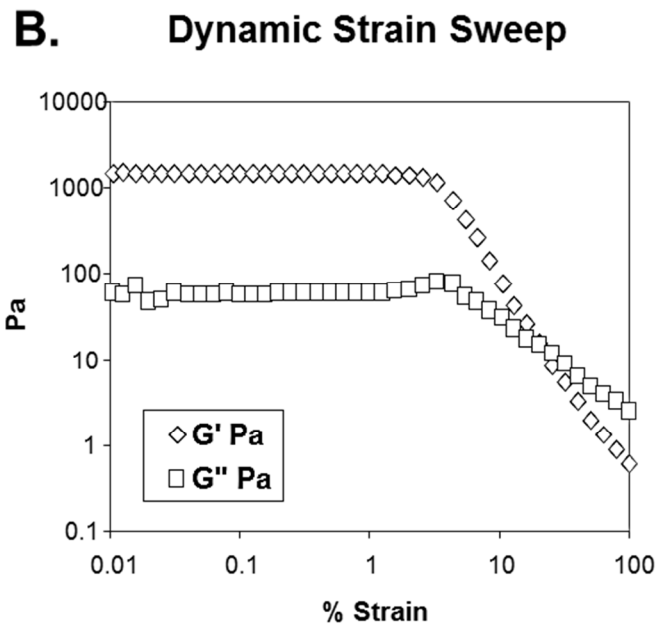

**Figure S5:** (A) Dynamic frequency and (B) strain sweep of 1wt% M(Phe) gels at 50°C in 125 mM borate, 10 mM NaCl, pH 9 buffer

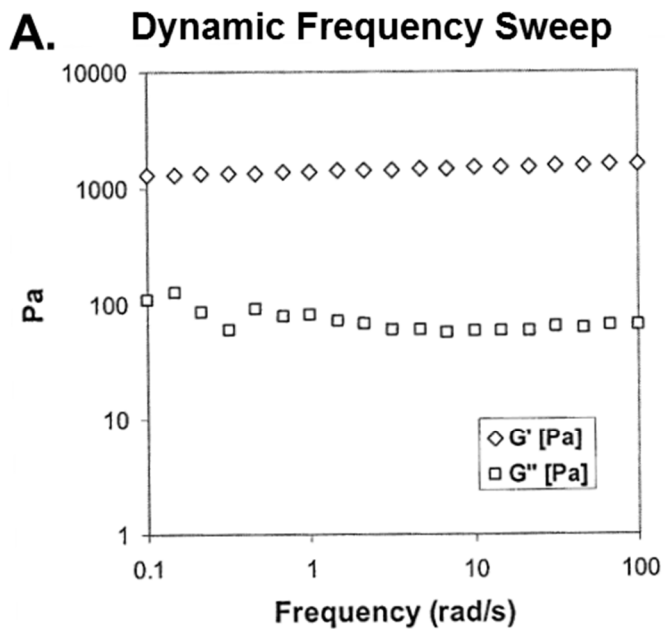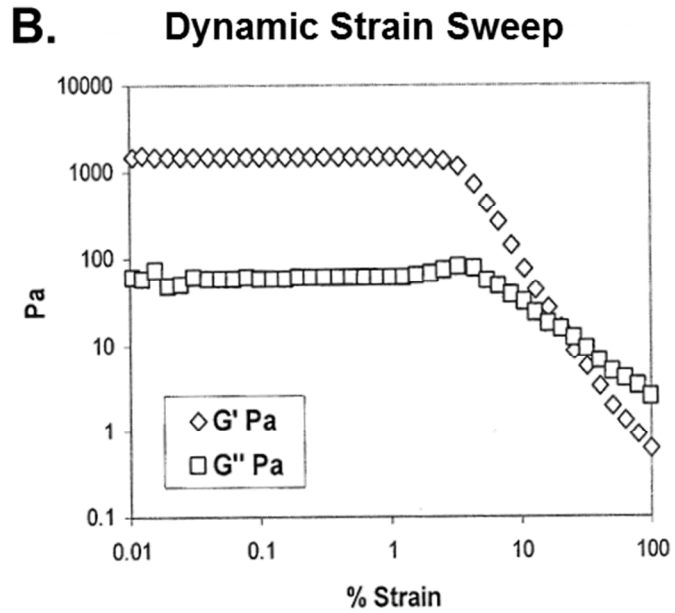

**Figure S6:** (A) Dynamic frequency and (B) strain sweep of 1wt% M(Ile) gels at 50°C in 125 mM borate, 10 mM NaCl, pH 9 buffer

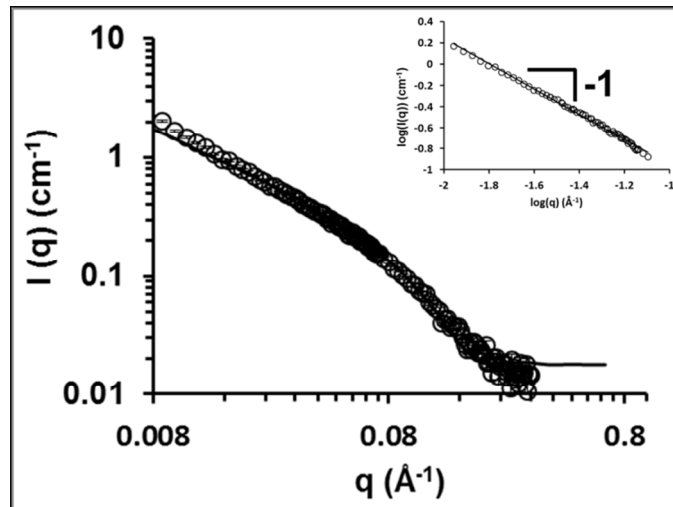

**Figure S7:** SANS analysis of M(Nva), with data fit using a cylindrical form factor. Inset shows a slope of approximately -1 for  $\log I(q)$  versus  $\log q$ .



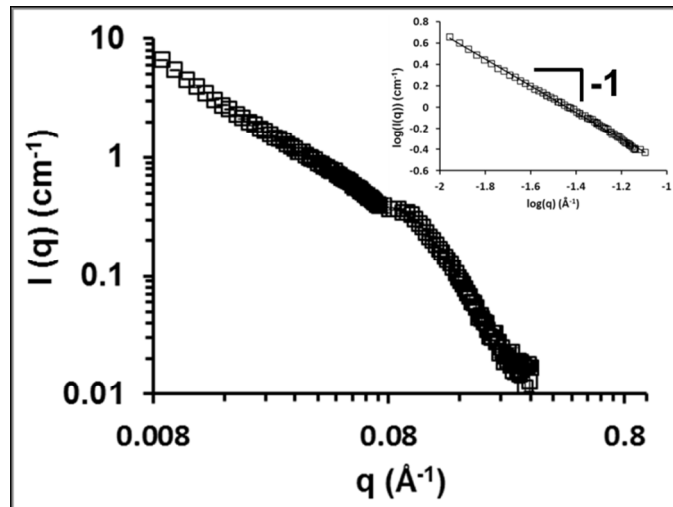

**Figure S8:** SANS analysis of M(Nle). Inset shows a slope of approximately -1 for  $\log I(q)$  versus  $\log q$ .

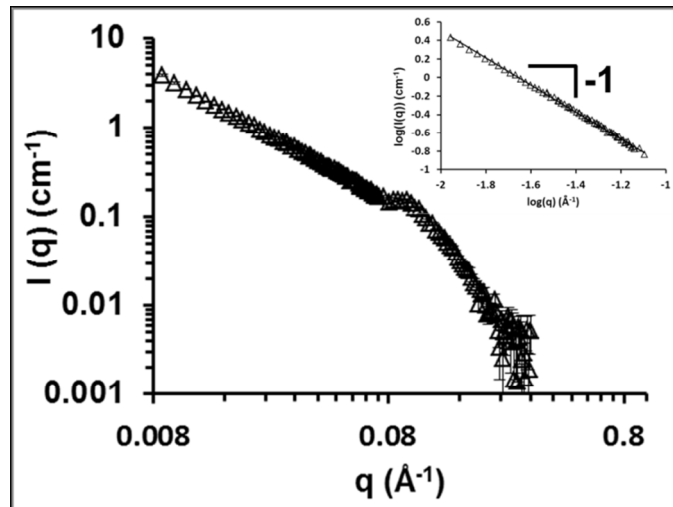

**Figure S9:** SANS analysis of M(Phe). Inset shows a slope of approximately -1 for  $\log I(q)$  versus  $\log q$ .

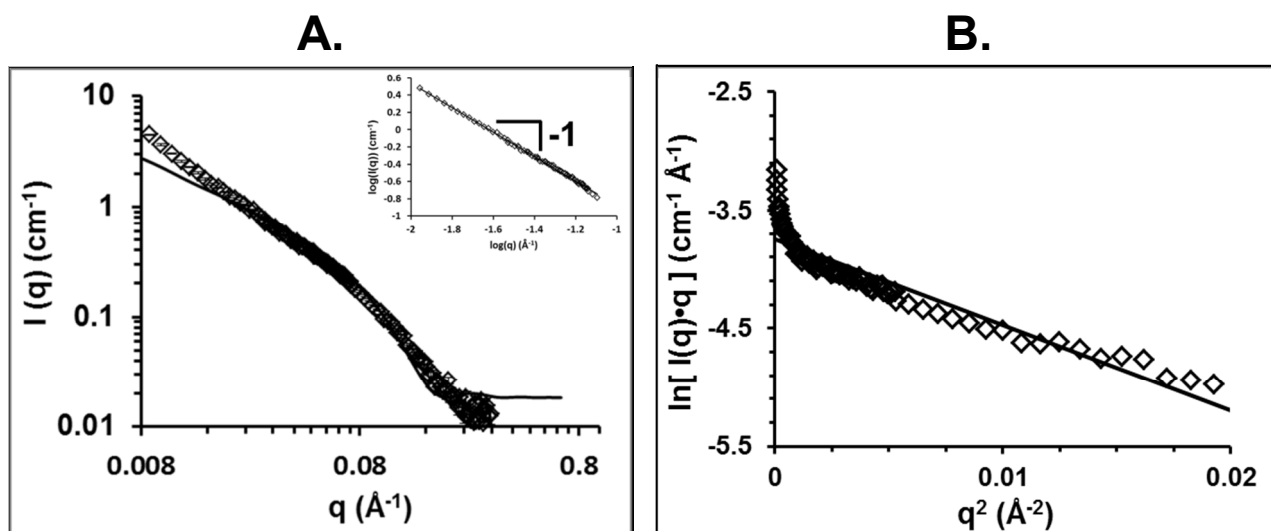

**Figure S10:** (A) SANS analysis of M(Ile), with data fit using a cylindrical form factor. Inset shows a slope of approximately -1 for  $\log I(q)$  versus  $\log q$ . (B) SANS data for M(Ile) plotted as  $\ln[I(q) \cdot q]$  vs  $q^2$ . A linear fit was applied to the data in the low  $q$  regime to calculate fibril cross-sectional diameter using a modified Guinier analysis.

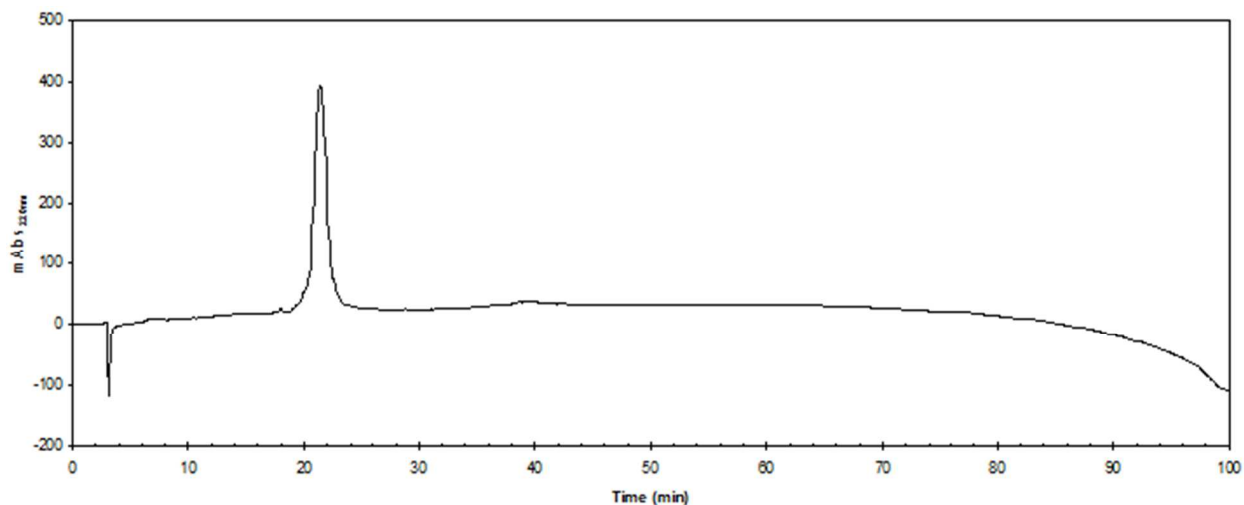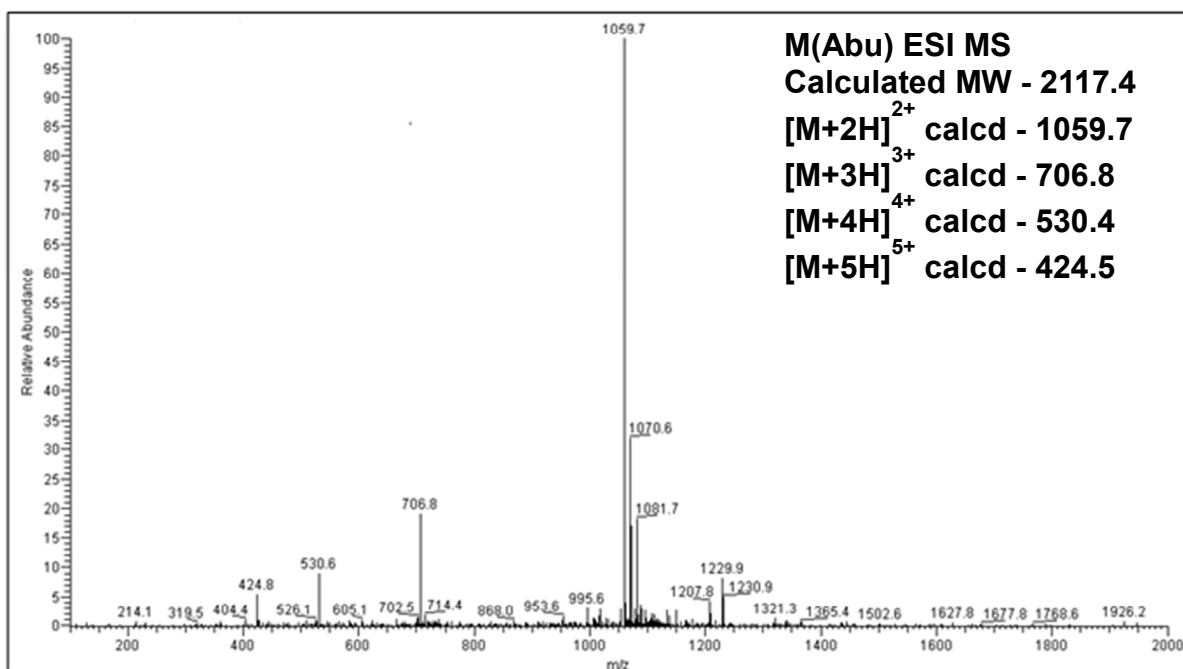

**Figure S11:** M(Abu) – Analytical HPLC (Vydac C18) 0-100% B; 100 min; 20°C.

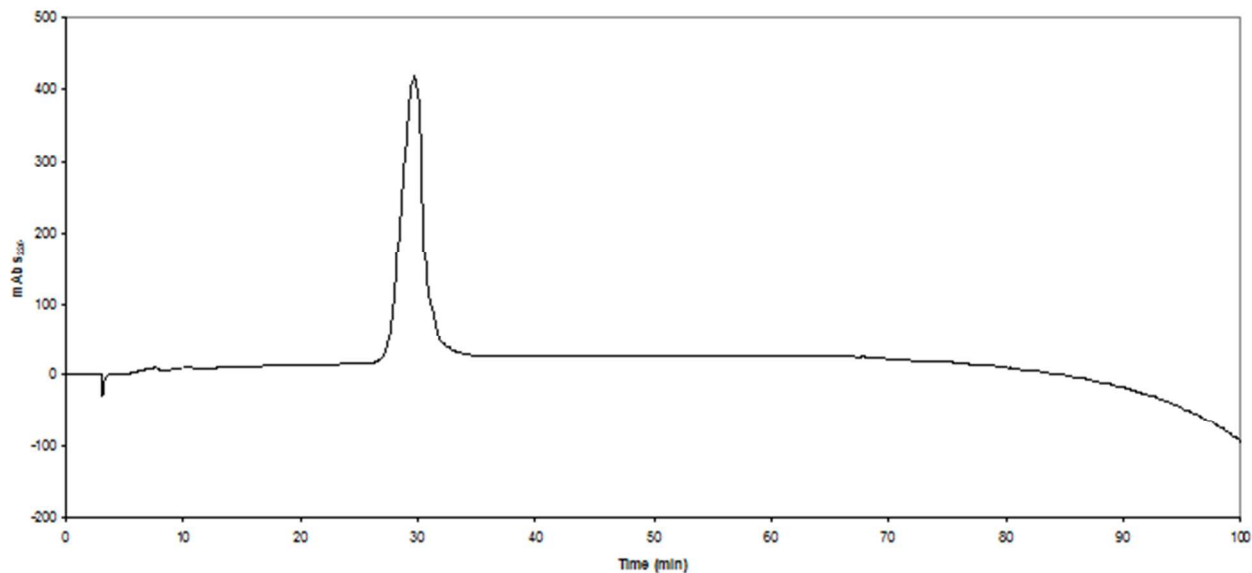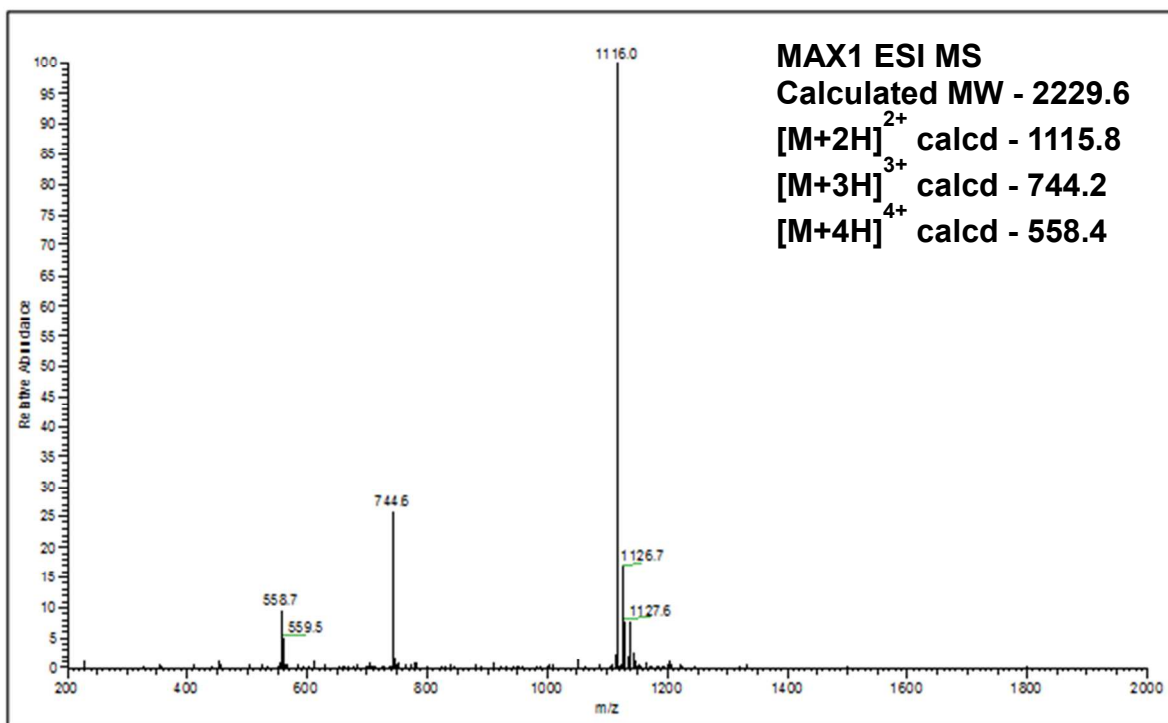

**Figure S12:** MAX1 – Analytical HPLC (Vydac C18) 0-100% B; 100 min; 20°C.

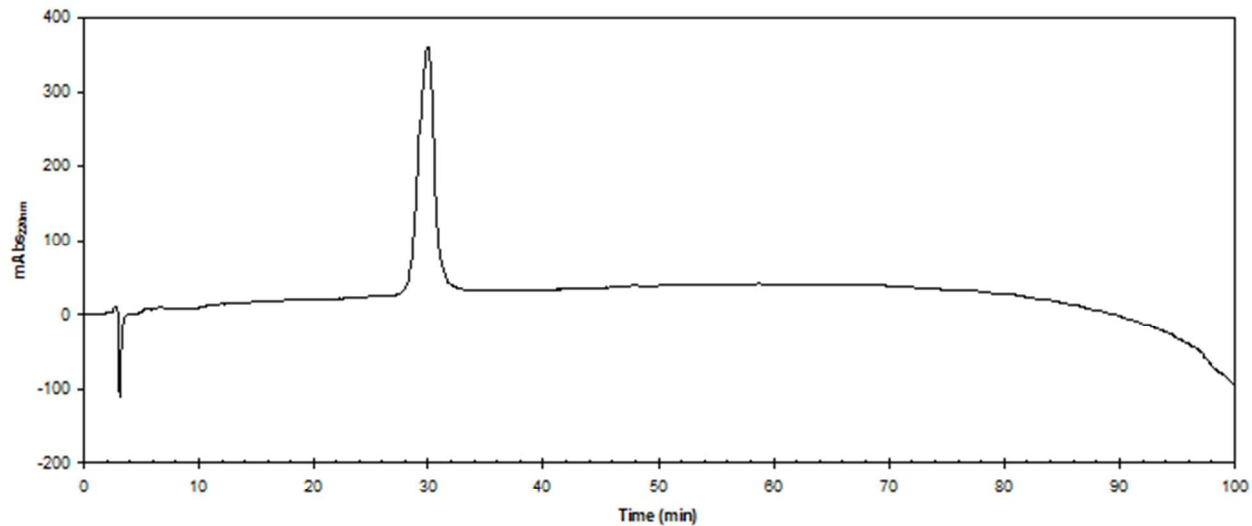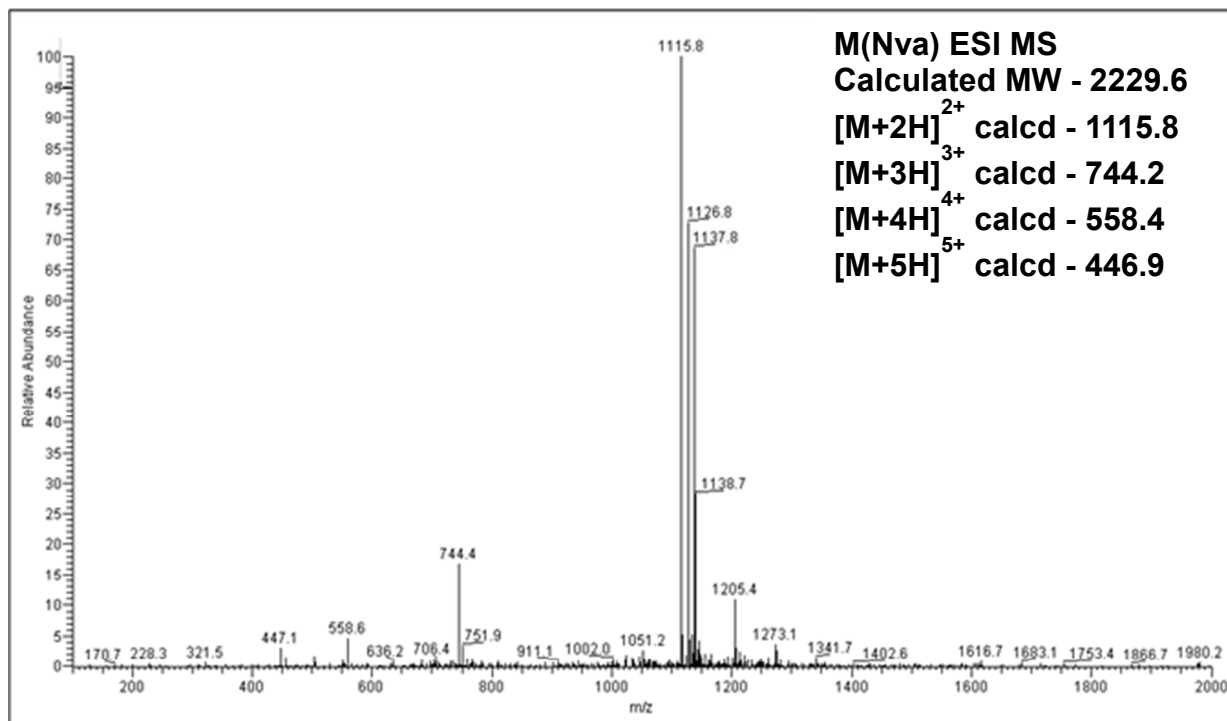

**Figure S13:** M(Nva) – Analytical HPLC (Vydac C18) 0-100% B; 100 min; 20°C.

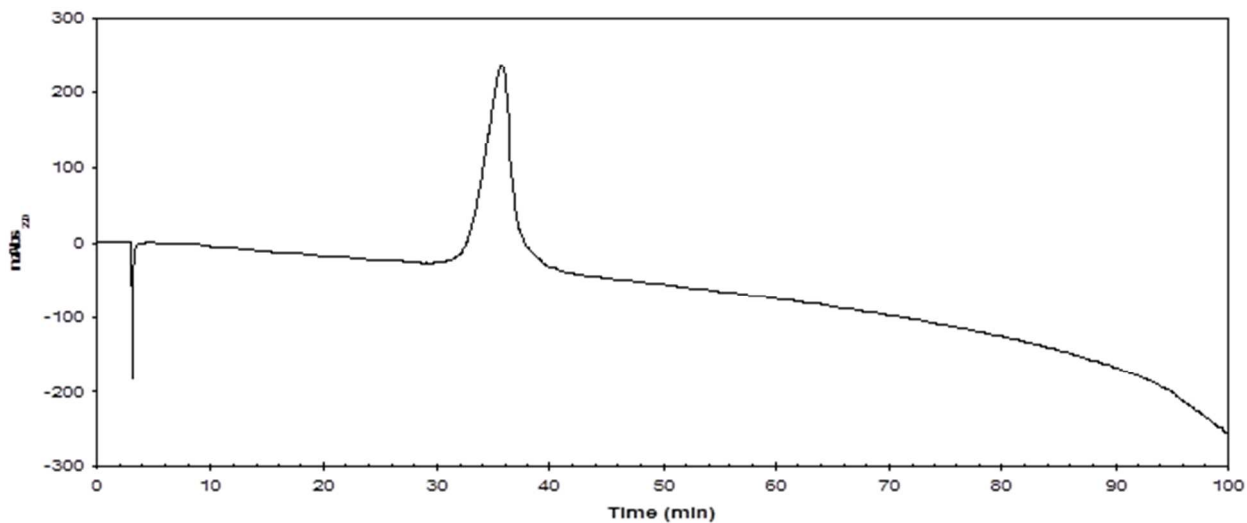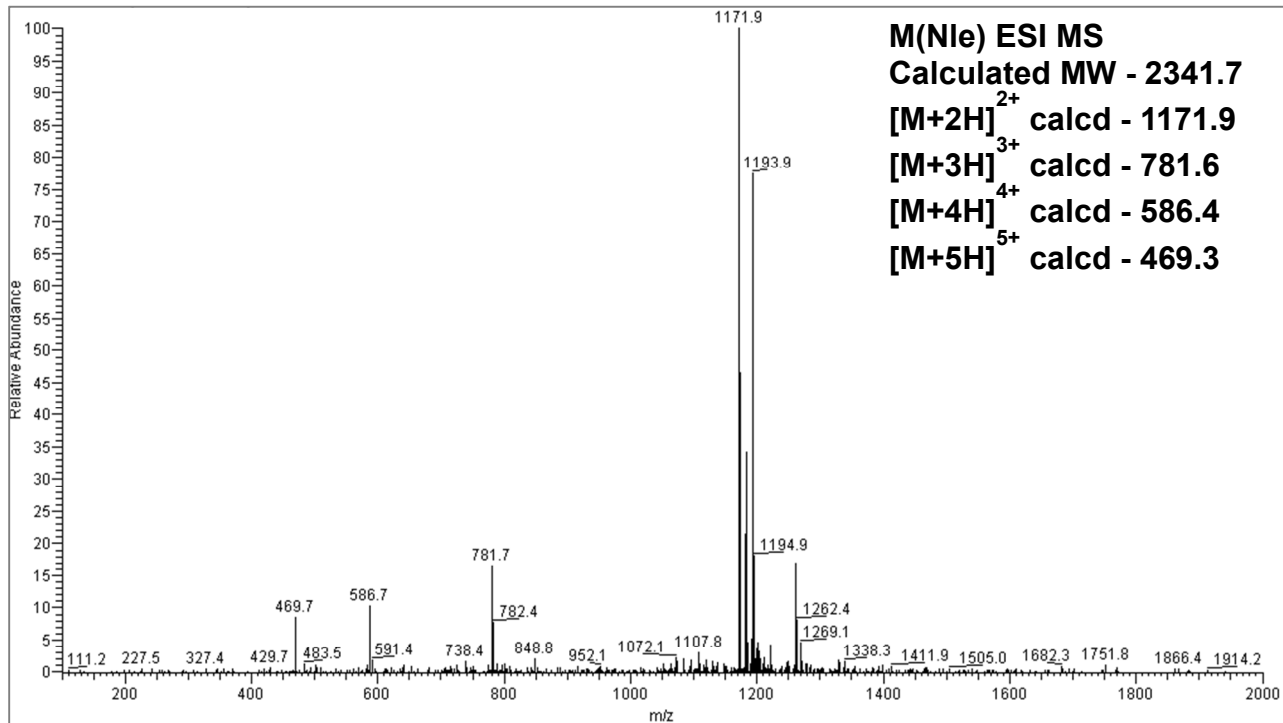

**Figure S14:** M(Nle) – Analytical HPLC (Vydac C18) 0-100% B; 100 min; 20°C.

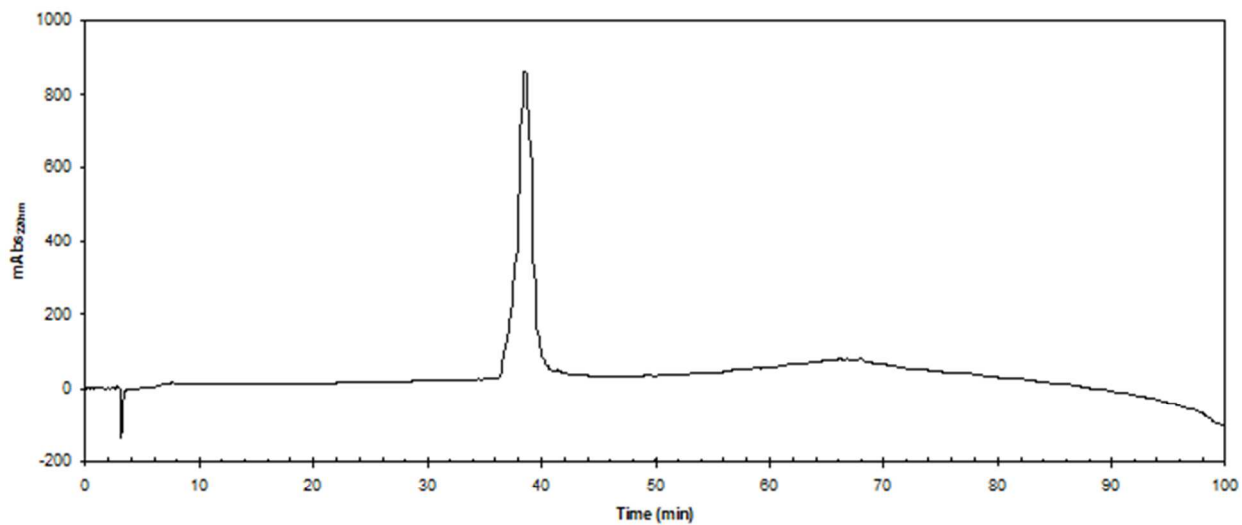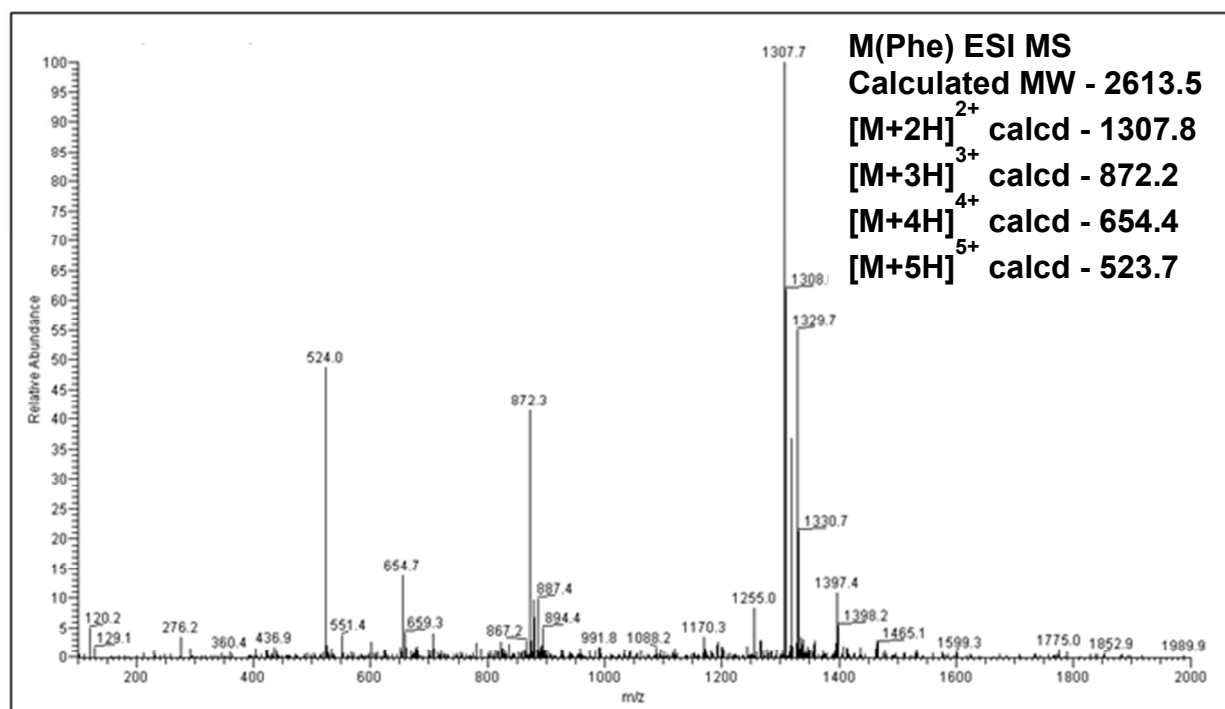

**Figure S15:** M(Phe) – Analytical HPLC (Vydac C18) 0-100% B; 100 min; 20°C.



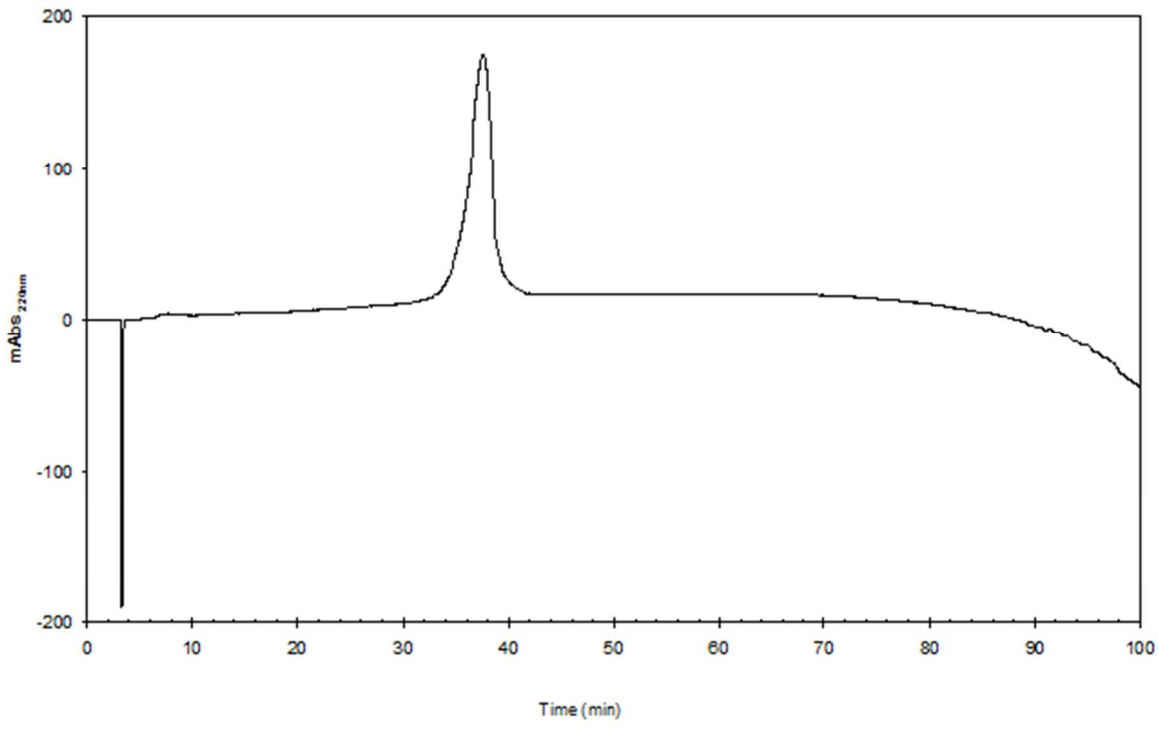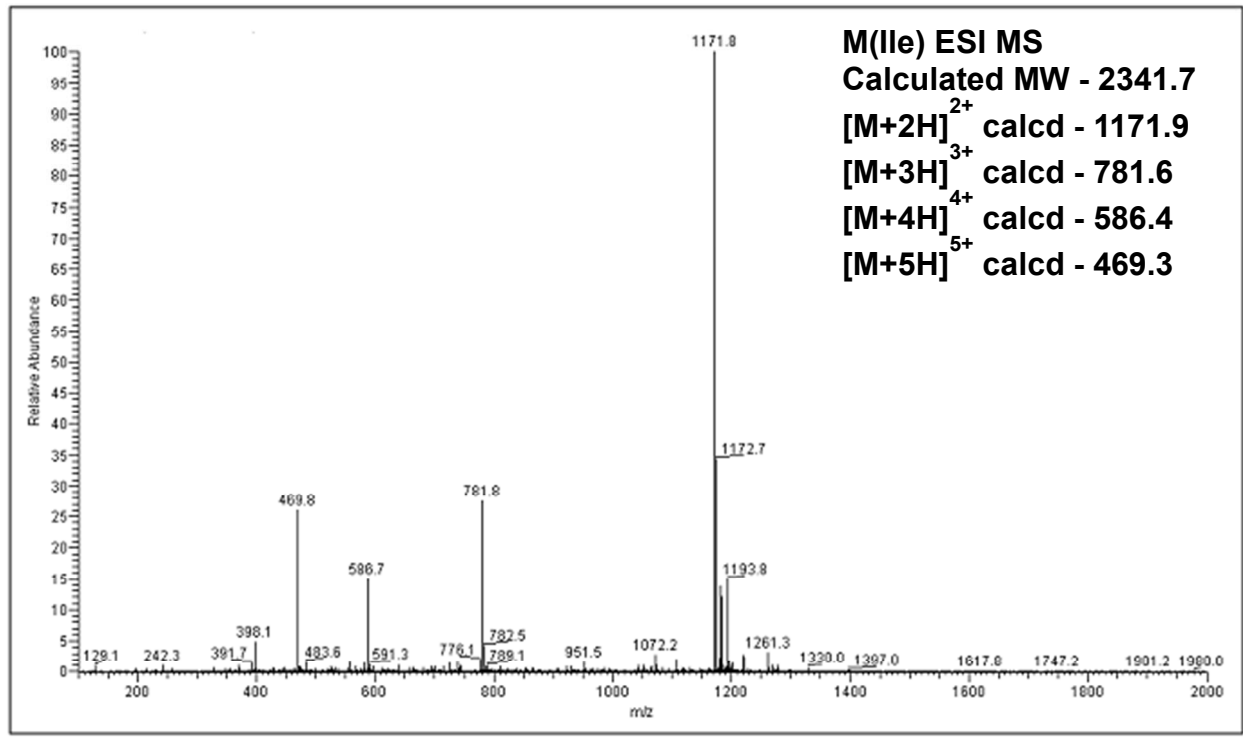

**Figure S16:** M(Ile) – Analytical HPLC (Vydac C18) 0-100% B; 100 min; 20°C.
